# Supplementary material for: Characterization, Comparison of Four New Mitogenomes of Centrotinae (Hemiptera: Membracidae) and Phylogenetic Implications Supports New Synonymy
Source: MDPI journal article supplement (doi:10.3390/life12010061), 2022-01-03
Supplement: s1 [file s1]

**Table S4.** Organization of the mitogenome of *A. lineatus*.

| Name             | Location |       | Size(bp) | Intergenic nucleotides | Codon |      | Strand |
|------------------|----------|-------|----------|------------------------|-------|------|--------|
|                  | From     | To    |          |                        | Start | Stop |        |
| <i>trnI</i>      | 1        | 66    | 66       |                        |       |      | +      |
| <i>trnQ</i>      | 64       | 131   | 68       | -3                     |       |      | -      |
| <i>trnM</i>      | 131      | 196   | 66       | -1                     |       |      | +      |
| <i>nad2</i>      | 197      | 1,156 | 960      |                        | ATG   | TAG  | +      |
| <i>trnW</i>      | 1,156    | 1,219 | 64       | -1                     |       |      | +      |
| <i>trnC</i>      | 1,219    | 1,282 | 64       | -1                     |       |      | -      |
| <i>trnY</i>      | 1,283    | 1,346 | 64       |                        |       |      | -      |
| <i>coxI</i>      | 1,345    | 2,878 | 1,534    | -2                     | ATG   | T    | +      |
| <i>tRNA-Leu2</i> | 2,879    | 2,944 | 66       |                        |       |      | +      |
| <i>cox2</i>      | 2,945    | 3,620 | 676      |                        | ATA   | T    | +      |
| <i>trnK</i>      | 3,618    | 3,687 | 70       | -3                     |       |      | +      |
| <i>trnD</i>      | 3,688    | 3,751 | 64       |                        |       |      | +      |
| <i>atp8</i>      | 3,752    | 3,904 | 153      |                        | ATA   | TAA  | +      |
| <i>atp6</i>      | 3,898    | 4,548 | 651      | -7                     | ATG   | TAA  | +      |
| <i>cox3</i>      | 4,549    | 5,328 | 780      |                        | ATG   | TAA  | +      |
| <i>trnG</i>      | 5,329    | 5,388 | 60       |                        |       |      | +      |
| <i>nad3</i>      | 5,392    | 5,742 | 351      | 3                      | ATA   | TAA  | +      |
| <i>trnA</i>      | 5,741    | 5,803 | 63       | -2                     |       |      | +      |
| <i>trnR</i>      | 5,805    | 5,866 | 62       | 1                      |       |      | +      |
| <i>trnN</i>      | 5,867    | 5,929 | 63       |                        |       |      | +      |
| <i>tRNA-Ser1</i> | 5,929    | 5,994 | 66       | -1                     |       |      | +      |
| <i>trnE</i>      | 5,994    | 6,058 | 65       | -1                     |       |      | +      |
| <i>trnF</i>      | 6,058    | 6,120 | 63       | -1                     |       |      | -      |

**Table S4. Cont.**

|              |        |        |       |    |     |     |   |
|--------------|--------|--------|-------|----|-----|-----|---|
| <i>nad5</i>  | 6,121  | 7,783  | 1,663 |    | ATT | T   | - |
| <i>trnH</i>  | 7,787  | 7,847  | 61    | 3  |     |     | - |
| <i>nad4</i>  | 7,850  | 9,160  | 1,311 | 2  | ATG | TAA | - |
| <i>nad4L</i> | 9,154  | 9,429  | 276   | -7 | ATG | TAA | - |
| <i>trnT</i>  | 9,432  | 9,493  | 62    | 2  |     |     | + |
| <i>trnP</i>  | 9,494  | 9,556  | 63    |    |     |     | - |
| <i>nad6</i>  | 9,559  | 10,044 | 486   | 2  | ATA | TAA | + |
| <i>cytb</i>  | 10,037 | 11,170 | 1,134 | -8 | ATG | TAG | + |
| <i>trnS2</i> | 11,169 | 11,232 | 64    | -2 |     |     | + |
| <i>nad1</i>  | 11,232 | 12,167 | 936   | -1 | ATA | TAA | - |
| <i>trnL1</i> | 12,165 | 12,230 | 66    | -3 |     |     | - |
| <i>rrnL</i>  | 12,231 | 13,392 | 1,162 |    |     |     | - |
| <i>trnV</i>  | 13,393 | 13,455 | 63    |    |     |     | - |
| <i>rrnS</i>  | 13,455 | 14,278 | 824   | -1 |     |     | - |
| <i>CR</i>    | 14,279 | 16,218 | 1,940 |    |     |     | + |
