# Supplementary material for: Characterization, Comparison of Four New Mitogenomes of Centrotinae (Hemiptera: Membracidae) and Phylogenetic Implications Supports New Synonymy
Source: MDPI journal article supplement (doi:10.3390/life12010061), 2022-01-03
Supplement: s1 [file s1]

**Table S2.** The best partitioning schemes and substitution models for PCG123 dataset comprising 13 PCGs of 59 species used for BI phylogenetic analyses.

| <b>Subset</b> | <b>Best Model</b> | <b>Partition names</b>                                                  |
|---------------|-------------------|-------------------------------------------------------------------------|
| Partition1    | GTR+I+G           | <i>atp6_codon1, nad4L_codon1, nad1_codon1, nad4_codon1, nad5_codon1</i> |
| Partition2    | GTR+I+G           | <i>nad3_codon2, atp6_codon2, atp8_codon2, nad2_codon2, nad6_codon2</i>  |
| Partition3    | GTR+I+G           | <i>cytb_codon3, nad3_codon3, atp8_codon3, atp6_codon3, nad6_codon3</i>  |
| Partition4    | GTR+I+G           | <i>atp8_codon1, nad2_codon1, nad3_codon1, nad6_codon1</i>               |
| Partition5    | GTR+I+G           | <i>cox1_codon1</i>                                                      |
| Partition6    | GTR+I+G           | <i>cox1_codon2, cox3_codon2, cox2_codon2, cytb_codon2</i>               |
| Partition7    | HKY+I+G           | <i>cox1_codon3</i>                                                      |
| Partition8    | GTR+I+G           | <i>cox3_codon1, cox2_codon1, cytb_codon1</i>                            |
| Partition9    | HKY+G             | <i>cox3_codon3, cox2_codon3</i>                                         |
| Partition10   | GTR+I+G           | <i>nad5_codon2, nad4_codon2, nad1_codon2, nad4L_codon2,</i>             |
| Partition11   | HKY+G             | <i>nad1_codon3</i>                                                      |
| Partition12   | GTR+G             | <i>nad2_codon3</i>                                                      |
| Partition13   | HKY+G             | <i>nad4_codon3, nad4L_codon3, nad5_codon3</i>                           |
