# Supplementary material for: Characterization, Comparison of Four New Mitogenomes of Centrotinae (Hemiptera: Membracidae) and Phylogenetic Implications Supports New Synonymy
Source: MDPI journal article supplement (doi:10.3390/life12010061), 2022-01-03
Supplement: s1 [file s1]

**Table S5.** Organization of the mitogenome of *A. yunnanensis*.

| Name         | Location |       | Size(bp) | Intergenic nucleotides | Codon |      | Strand |
|--------------|----------|-------|----------|------------------------|-------|------|--------|
|              | From     | To    |          |                        | Start | Stop |        |
| <i>trnI</i>  | 1        | 66    | 66       |                        |       |      | +      |
| <i>trnQ</i>  | 64       | 131   | 68       | -3                     |       |      | -      |
| <i>trnM</i>  | 131      | 197   | 67       | -1                     |       |      | +      |
| <i>nad2</i>  | 198      | 1,157 | 960      |                        | ATG   | TAG  | +      |
| <i>trnW</i>  | 1,157    | 1,218 | 62       | -1                     |       |      | +      |
| <i>trnC</i>  | 1,218    | 1,282 | 65       | -1                     |       |      | -      |
| <i>trnY</i>  | 1,283    | 1,346 | 64       |                        |       |      | -      |
| <i>cox1</i>  | 1,345    | 2,878 | 1,534    | -2                     | ATG   | T    | +      |
| <i>trnL2</i> | 2,879    | 2,944 | 66       |                        |       |      | +      |
| <i>cox2</i>  | 2,945    | 3,617 | 673      |                        | ATT   | T    | +      |
| <i>trnK</i>  | 3,618    | 3,687 | 70       |                        |       |      | +      |
| <i>trnD</i>  | 3,688    | 3,750 | 63       |                        |       |      | +      |
| <i>atp8</i>  | 3,751    | 3,903 | 153      |                        | ATA   | TAA  | +      |
| <i>atp6</i>  | 3,897    | 4,547 | 651      | -7                     | ATG   | TAA  | +      |
| <i>cox3</i>  | 4,548    | 5,327 | 780      |                        | ATG   | TAA  | +      |
| <i>trnG</i>  | 5,327    | 5,387 | 61       | -1                     |       |      | +      |
| <i>nad3</i>  | 5,388    | 5,741 | 354      |                        | ATA   | TAA  | +      |
| <i>trnA</i>  | 5,740    | 5,802 | 63       | -2                     |       |      | +      |
| <i>trnR</i>  | 5,804    | 5,866 | 63       | 1                      |       |      | +      |
| <i>trnN</i>  | 5,866    | 5,930 | 65       | -1                     |       |      | +      |
| <i>trnS1</i> | 5,930    | 5,995 | 66       | -1                     |       |      | +      |
| <i>trnE</i>  | 5,995    | 6,057 | 63       | -1                     |       |      | +      |
| <i>trnF</i>  | 6,057    | 6,120 | 64       | -1                     |       |      | -      |

**Table S5. Cont.**

|              |        |        |       |    |     |     |   |
|--------------|--------|--------|-------|----|-----|-----|---|
| <i>nad5</i>  | 6,121  | 7,786  | 1,666 |    | TTG | T   | - |
| <i>trnH</i>  | 7,787  | 7,847  | 61    |    |     |     | - |
| <i>nad4</i>  | 7,850  | 9,154  | 1,305 | 2  | ATG | TAA | - |
| <i>nad4L</i> | 9,148  | 9,423  | 276   | -7 | ATG | TAA | - |
| <i>trnT</i>  | 9,426  | 9,486  | 61    | 2  |     |     | + |
| <i>trnP</i>  | 9,487  | 9,549  | 63    |    |     |     | - |
| <i>nad6</i>  | 9,552  | 10,037 | 486   | 2  | ATA | TAA | + |
| <i>cytb</i>  | 10,030 | 11,163 | 1,134 | -8 | ATG | TAG | + |
| <i>trnS2</i> | 11,162 | 11,225 | 64    | -2 |     |     | + |
| <i>nad1</i>  | 11,225 | 12,157 | 933   | -1 | ATT | TAA | - |
| <i>trnL1</i> | 12,158 | 12,224 | 67    |    |     |     | - |
| <i>rrnL</i>  | 12,225 | 13,386 | 1,162 |    |     |     | - |
| <i>trnV</i>  | 13,387 | 13,449 | 63    |    |     |     | - |
| <i>rrnS</i>  | 13,450 | 14,185 | 736   |    |     |     | - |
| <i>CR</i>    | 14,186 | 14,755 | 570   |    |     |     | + |
