# Supplementary material for: Characterization, Comparison of Four New Mitogenomes of Centrotinae (Hemiptera: Membracidae) and Phylogenetic Implications Supports New Synonymy
Source: MDPI journal article supplement (doi:10.3390/life12010061), 2022-01-03
Supplement: s1 [file s1]

**Table S1.** The best partitioning schemes and substitution models for PCG123 dataset comprising 13 PCGs of 59 species used for ML phylogenetic analyses.

| <b>Subset</b> | <b>Best Model</b> | <b>Partition names</b>                                                                                     |
|---------------|-------------------|------------------------------------------------------------------------------------------------------------|
| Partition1    | GTR+I+G           | <i>nad4L_codon1</i> , <i>atp6_codon1</i> , <i>nad1_codon1</i> , <i>nad5_codon1</i> ,<br><i>nad4_codon1</i> |
| Partition2    | TVM+I+G           | <i>cox3_codon2</i> , <i>cytb_codon2</i> , <i>cox2_codon2</i> , <i>atp6_codon2</i>                          |
| Partition3    | HKY+I+G           | <i>atp6_codon3</i> , <i>cox3_codon3</i> , <i>cox2_codon3</i>                                               |
| Partition4    | GTR+I+G           | <i>atp8_codon1</i> , <i>nad2_codon1</i> , <i>nad3_codon1</i> , <i>nad6_codon1</i>                          |
| Partition5    | TVM+I+G           | <i>nad3_codon2</i> , <i>nad6_codon2</i> , <i>nad2_codon2</i> , <i>atp8_codon2</i>                          |
| Partition6    | GTR+G             | <i>atp8_codon3</i> , <i>cytb_codon3</i> , <i>nad3_codon3</i> , <i>nad6_codon3</i>                          |
| Partition7    | GTR+I+G           | <i>cox1_codon1</i>                                                                                         |
| Partition8    | TVM+I+G           | <i>cox1_codon2</i>                                                                                         |
| Partition9    | TIM+I+G           | <i>cox1_codon3</i>                                                                                         |
| Partition10   | GTR+I+G           | <i>cox3_codon1</i> , <i>cox2_codon1</i> , <i>cytb_codon1</i>                                               |
| Partition11   | GTR+I+G           | <i>nad4_codon2</i> , <i>nad5_codon2</i> , <i>nad1_codon2</i> , <i>nad4L_codon2</i>                         |
| Partition12   | HKY+G             | <i>nad1_codon3</i>                                                                                         |
| Partition13   | TRN+G             | <i>nad2_codon3</i>                                                                                         |
| Partition14   | HKY+G             | <i>nad4_codon3</i> , <i>nad4L_codon3</i> , <i>nad5_codon3</i>                                              |
