# Supplementary material for: Characterization, Comparison of Four New Mitogenomes of Centrotinae (Hemiptera: Membracidae) and Phylogenetic Implications Supports New Synonymy
Source: MDPI journal article supplement (doi:10.3390/life12010061), 2022-01-03
Supplement: s1 [file s1]

**Table S3.** Nucleotide composition and skewness comparison of different elements of the four mitogenomes.

| Regions            | Species                   | Size (bp) | A%   | T%   | C%   | G%   | AT(%) | GC(%) | AT skew | GC skew |
|--------------------|---------------------------|-----------|------|------|------|------|-------|-------|---------|---------|
| PCGs               | <i>A. lineatus</i>        | 10,908    | 33.0 | 42.0 | 12.9 | 12.1 | 75.0  | 25.0  | -0.120  | -0.035  |
|                    | <i>A. yunnanensis</i>     | 10,902    | 33.0 | 41.8 | 13.0 | 12.1 | 74.8  | 25.1  | -0.117  | -0.035  |
|                    | <i>G. genistae</i>        | 10,920    | 33.1 | 43.9 | 11.4 | 11.6 | 77.0  | 23.0  | -0.140  | 0.010   |
|                    | <i>T. longivalvulatus</i> | 10,911    | 32.0 | 43.2 | 12.5 | 12.3 | 75.2  | 24.8  | -0.148  | -0.009  |
| 1st codon position | <i>A. lineatus</i>        | 3,636     | 35.5 | 37.1 | 11.4 | 16.1 | 72.6  | 27.5  | -0.022  | 0.170   |
|                    | <i>A. yunnanensis</i>     | 3,634     | 36.1 | 36.4 | 11.7 | 15.8 | 72.5  | 27.5  | -0.004  | 0.151   |
|                    | <i>G. genistae</i>        | 3,640     | 36.2 | 37.8 | 10.7 | 15.3 | 74.0  | 26.0  | -0.021  | 0.178   |
|                    | <i>T. longivalvulatus</i> | 3,637     | 35.8 | 37.4 | 11.1 | 15.7 | 73.2  | 26.8  | -0.022  | 0.172   |
| 2nd codon position | <i>A. lineatus</i>        | 3,636     | 20.3 | 47.7 | 18.0 | 14.0 | 68.0  | 32.0  | -0.403  | -0.123  |
|                    | <i>A. yunnanensis</i>     | 3,634     | 20.6 | 47.7 | 17.8 | 13.9 | 68.3  | 31.7  | -0.398  | -0.123  |
|                    | <i>G. genistae</i>        | 3,640     | 20.5 | 48.2 | 17.4 | 14.0 | 68.7  | 31.4  | -0.402  | -0.109  |
|                    | <i>T. longivalvulatus</i> | 3,637     | 20.8 | 47.8 | 17.2 | 14.2 | 68.6  | 31.4  | -0.394  | -0.097  |
| 3rd codon position | <i>A. lineatus</i>        | 3,636     | 43.3 | 41.3 | 9.4  | 6.1  | 84.6  | 15.5  | 0.024   | -0.215  |
|                    | <i>A. yunnanensis</i>     | 3,634     | 42.4 | 41.2 | 9.7  | 6.7  | 83.6  | 16.4  | 0.013   | -0.180  |
|                    | <i>G. genistae</i>        | 3,640     | 42.7 | 45.7 | 6.1  | 5.5  | 88.4  | 11.6  | -0.035  | -0.045  |
|                    | <i>T. longivalvulatus</i> | 3,637     | 39.6 | 44.3 | 9.2  | 7.0  | 83.9  | 16.2  | -0.056  | -0.138  |
| Control region     | <i>A. lineatus</i>        | 1,940     | 40.5 | 39.3 | 10.1 | 10.2 | 79.8  | 20.3  | 0.003   | 0       |
|                    | <i>A. yunnanensis</i>     | 570       | 44.4 | 46.3 | 4.7  | 4.6  | 90.7  | 9.3   | -0.019  | 0       |
|                    | <i>G. genistae</i>        | 1,633     | 37.5 | 34.2 | 5.9  | 22.4 | 71.7  | 28.3  | 0.584   | 0       |
|                    | <i>T. longivalvulatus</i> | 1,099     | 44.5 | 39.3 | 7.2  | 9.0  | 83.8  | 16.2  | 0.112   | 0       |
| tRNAs              | <i>A. lineatus</i>        | 1,413     | 40.3 | 38.7 | 8.6  | 12.3 | 79.0  | 20.9  | 0.021   | 0.176   |
|                    | <i>A. yunnanensis</i>     | 1,415     | 39.4 | 39.2 | 9.1  | 12.4 | 78.6  | 21.5  | 0.003   | 0.151   |
|                    | <i>G. genistae</i>        | 1,402     | 39.9 | 39.9 | 7.9  | 12.2 | 79.8  | 20.1  | 0.000   | 0.213   |
|                    | <i>T. longivalvulatus</i> | 1,393     | 40.0 | 38.9 | 8.9  | 12.2 | 78.9  | 21.1  | 0.014   | 0.156   |

Table S3. Cont.

|             |                           |        |      |      |      |      |      |      |        |        |
|-------------|---------------------------|--------|------|------|------|------|------|------|--------|--------|
| rRNAs       | <i>A. lineatus</i>        | 1,986  | 30.7 | 48.0 | 7.8  | 13.4 | 78.7 | 21.2 | -0.220 | 0.265  |
|             | <i>A. yunnanensis</i>     | 1,898  | 31.9 | 47.0 | 8.0  | 13.1 | 78.9 | 21.1 | -0.192 | 0.240  |
|             | <i>G. genistae</i>        | 1,910  | 32.4 | 47.5 | 7.3  | 12.8 | 79.9 | 20.1 | -0.189 | 0.276  |
|             | <i>T. longivalvulatus</i> | 1,370  | 31.1 | 45.8 | 8.4  | 14.7 | 76.9 | 23.1 | -0.191 | 0.274  |
| Full genome | <i>A. lineatus</i>        | 16,218 | 45.3 | 31.1 | 14.4 | 9.2  | 76.4 | 23.6 | 0.186  | -0.218 |
|             | <i>A. yunnanensis</i>     | 14,755 | 45.3 | 31.0 | 14.5 | 9.2  | 76.3 | 23.7 | 0.186  | -0.220 |
|             | <i>G. genistae</i>        | 15,829 | 43.0 | 34.0 | 12.0 | 10.9 | 77.0 | 22.9 | 0.117  | -0.045 |
|             | <i>T. longivalvulatus</i> | 15,325 | 44.2 | 32.7 | 13.6 | 9.6  | 76.9 | 23.2 | 0.150  | -0.169 |
