# Supplementary material for: Characterization, Comparison of Four New Mitogenomes of Centrotinae (Hemiptera: Membracidae) and Phylogenetic Implications Supports New Synonymy
Source: MDPI journal article supplement (doi:10.3390/life12010061), 2022-01-03
Supplement: s1 [file s1]

**Table S6.** Organization of the mitogenome of *G. genistae*.

| Name         | Location |       | Size(bp) | Intergenic nucleotides | Codon |      | Strand |
|--------------|----------|-------|----------|------------------------|-------|------|--------|
|              | From     | To    |          |                        | Start | Stop |        |
| <i>trnI</i>  | 1        | 64    | 64       |                        |       |      | +      |
| <i>trnQ</i>  | 62       | 129   | 68       | -3                     |       |      | -      |
| <i>trnM</i>  | 129      | 195   | 67       | -1                     |       |      | +      |
| <i>nad2</i>  | 196      | 1,158 | 963      |                        | ATT   | TAG  | +      |
| <i>trnW</i>  | 1,157    | 1,218 | 62       | -2                     |       |      | +      |
| <i>trnC</i>  | 1,219    | 1,278 | 60       |                        |       |      | -      |
| <i>trnY</i>  | 1,279    | 1,341 | 63       |                        |       |      | -      |
| <i>cox1</i>  | 1,340    | 2,873 | 1,534    | -2                     | ATG   | T    | +      |
| <i>trnL2</i> | 2,874    | 2,939 | 66       |                        |       |      | +      |
| <i>cox2</i>  | 2,940    | 3,621 | 682      |                        | ATA   | T    | +      |
| <i>trnK</i>  | 3,619    | 3,689 | 71       | -3                     |       |      | +      |
| <i>trnD</i>  | 3,690    | 3,751 | 62       |                        |       |      | +      |
| <i>atp8</i>  | 3,752    | 3,904 | 153      |                        | ATA   | TAA  | +      |
| <i>atp6</i>  | 3,898    | 4,548 | 651      | -7                     | ATG   | TAA  | +      |
| <i>cox3</i>  | 4,549    | 5,328 | 780      |                        | ATG   | TAA  | +      |
| <i>trnG</i>  | 5,327    | 5,386 | 60       | -2                     |       |      | +      |
| <i>nad3</i>  | 5,391    | 5,741 | 351      | 4                      | ATA   | TAA  | +      |
| <i>trnA</i>  | 5,739    | 5,798 | 60       | -3                     |       |      | +      |
| <i>trnR</i>  | 5,800    | 5,862 | 63       | 1                      |       |      | +      |
| <i>trnN</i>  | 5,861    | 5,927 | 67       | -2                     |       |      | +      |
| <i>trnS1</i> | 5,927    | 5,992 | 66       | -1                     |       |      | +      |
| <i>trnE</i>  | 5,992    | 6,053 | 62       | -1                     |       |      | +      |
| <i>trnF</i>  | 6,053    | 6,115 | 63       | -1                     |       |      | -      |

**Table S6. Cont.**

|              |        |        |       |     |     |     |   |
|--------------|--------|--------|-------|-----|-----|-----|---|
| <i>nad5</i>  | 6,117  | 7,779  | 1,663 | 1   | ATA | T   | - |
| <i>trnH</i>  | 7,782  | 7,842  | 61    | 2   |     |     | - |
| <i>nad4</i>  | 7,845  | 9,149  | 1,305 | 2   | ATG | TAA | - |
| <i>nad4L</i> | 9,143  | 9,418  | 276   | -7  | ATG | TAA | - |
| <i>trnT</i>  | 9,420  | 9,478  | 59    | 1   |     |     | + |
| <i>trnP</i>  | 9,479  | 9,544  | 66    |     |     |     | - |
| <i>nad6</i>  | 9,548  | 10,039 | 492   | 3   | ATT | TAA | + |
| <i>cytb</i>  | 10,026 | 11,162 | 1,137 | -14 | ATG | TAG | + |
| <i>trnS2</i> | 11,160 | 11,224 | 65    | -3  |     |     | + |
| <i>nad1</i>  | 11,219 | 12,154 | 936   | -6  | ATT | TAA | - |
| <i>trnL1</i> | 12,160 | 12,224 | 65    | 5   |     |     | - |
| <i>rrnL</i>  | 12,225 | 13,395 | 1,171 |     |     |     | - |
| <i>trnV</i>  | 13,396 | 13,457 | 62    |     |     |     | - |
| <i>rrnS</i>  | 13,458 | 14,196 | 739   |     |     |     | - |
| <i>CR</i>    | 14,197 | 15,829 | 1,633 |     |     |     | + |
