# Supplementary material for: Characterization, Comparison of Four New Mitogenomes of Centrotinae (Hemiptera: Membracidae) and Phylogenetic Implications Supports New Synonymy
Source: MDPI journal article supplement (doi:10.3390/life12010061), 2022-01-03
Supplement: s1 [file s1]

**Table S7.** Organization of the mitogenome of *T. longivalvulatus*.

| Name         | Location |       | Size(bp) | Intergenic nucleotides | Codon |      | Strand |
|--------------|----------|-------|----------|------------------------|-------|------|--------|
|              | From     | To    |          |                        | Start | Stop |        |
| <i>trnI</i>  | 1        | 62    | 62       |                        |       |      | +      |
| <i>trnQ</i>  | 60       | 128   | 69       | -3                     |       |      | -      |
| <i>trnM</i>  | 156      | 221   | 66       | 27                     |       |      | +      |
| <i>nad2</i>  | 222      | 1,190 | 969      |                        | ATT   | TAA  | +      |
| <i>trnW</i>  | 1,181    | 1,241 | 61       | -10                    |       |      | +      |
| <i>trnC</i>  | 1,242    | 1,301 | 60       |                        |       |      | -      |
| <i>trnY</i>  | 1,303    | 1,364 | 62       | 1                      |       |      | -      |
| <i>cox1</i>  | 1,363    | 2,896 | 1,534    | -2                     | ATG   | T    | +      |
| <i>trnL2</i> | 2,897    | 2,962 | 66       |                        |       |      | +      |
| <i>cox2</i>  | 2,963    | 3,641 | 679      |                        | ATA   | T    | +      |
| <i>trnK</i>  | 3,642    | 3,712 | 71       |                        |       |      | +      |
| <i>trnD</i>  | 3,713    | 3,774 | 62       |                        |       |      | +      |
| <i>atp8</i>  | 3,775    | 3,927 | 153      |                        | ATA   | TAA  | +      |
| <i>atp6</i>  | 3,921    | 4,568 | 648      | -7                     | ATG   | TAA  | +      |
| <i>cox3</i>  | 4,569    | 5,346 | 778      |                        | ATG   | T    | +      |
| <i>trnG</i>  | 5,347    | 5,407 | 61       |                        |       |      | +      |
| <i>nad3</i>  | 5,411    | 5,761 | 351      | 3                      | ATT   | TAA  | +      |
| <i>trnA</i>  | 5,760    | 5,822 | 63       | -2                     |       |      | +      |
| <i>trnR</i>  | 5,826    | 5,885 | 60       | 3                      |       |      | +      |
| <i>trnN</i>  | 5,885    | 5,949 | 65       | -1                     |       |      | +      |
| <i>trnS1</i> | 5,949    | 6,012 | 64       | -1                     |       |      | +      |
| <i>trnE</i>  | 6,012    | 6,074 | 63       | -1                     |       |      | +      |
| <i>trnF</i>  | 6,075    | 6,136 | 62       |                        |       |      | -      |

**Table S7. Cont.**

|              |        |        |       |    |     |     |   |
|--------------|--------|--------|-------|----|-----|-----|---|
| <i>nad5</i>  | 6,137  | 7,802  | 1,666 |    | TTG | T   | - |
| <i>trnH</i>  | 7,803  | 7,864  | 62    |    |     |     | - |
| <i>nad4</i>  | 7,867  | 9,171  | 1,305 | 2  | ATG | TAA | - |
| <i>nad4L</i> | 9,165  | 9,440  | 276   | -7 | ATG | TAA | - |
| <i>trnT</i>  | 9,443  | 9,503  | 61    | 2  |     |     | + |
| <i>trnP</i>  | 9,504  | 9,565  | 62    |    |     |     | - |
| <i>nad6</i>  | 9,568  | 10,053 | 486   | 2  | ATA | TAA | + |
| <i>cytb</i>  | 10,046 | 11,182 | 1,137 | -8 | ATG | TAA | + |
| <i>trnS2</i> | 11,184 | 11,247 | 64    | 1  |     |     | + |
| <i>nad1</i>  | 11,247 | 12,179 | 933   | -1 | ATT | TAA | - |
| <i>trnL1</i> | 12,180 | 12,244 | 65    |    |     |     | - |
| <i>rrnL</i>  | 12,272 | 13,426 | 1,154 |    |     |     | - |
| <i>trnV</i>  | 13,427 | 13,488 | 62    |    |     |     | - |
| <i>rrnS</i>  | 13,491 | 14,226 | 736   | 2  |     |     | - |
| CR           | 14,227 | 15,325 | 1,099 |    |     |     | + |
